# Supplementary material
Source: Springer Nature journal article supplement (https://www.springermedizin.de/resource/supplementary/12889_2011_3498_MOESM1_ESM.pdf/9489214)
Supplement: MOESM1 [file 9489214]

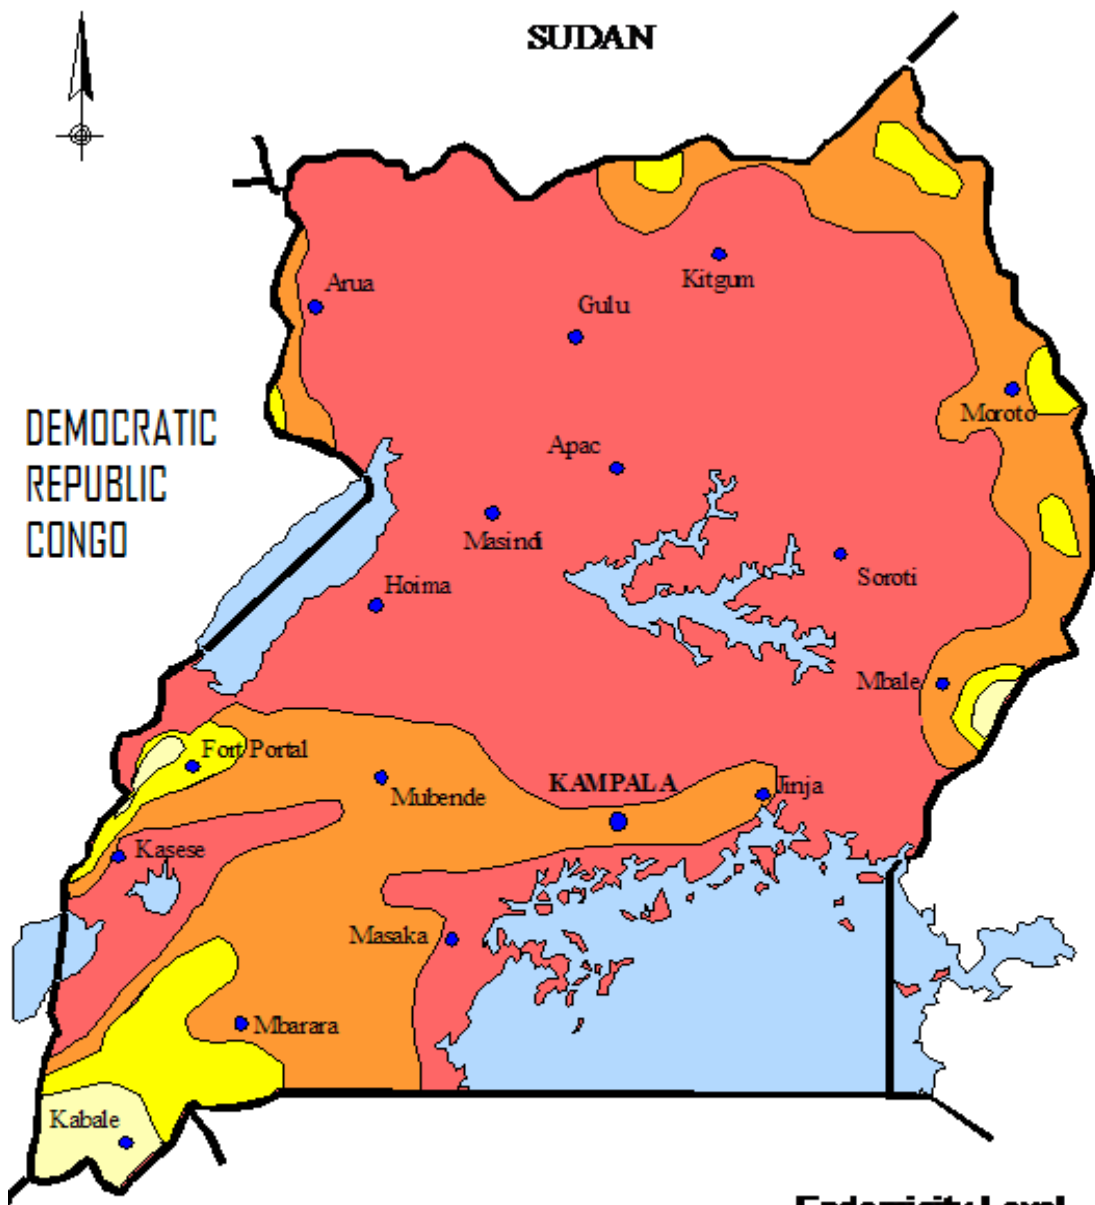

**Endemicity Level**

- very high
- medium-high
- low
- very low

RWANDA

TANZANIA

SUDAN

DEMOCRATIC  
REPUBLIC  
CONGO
